# Supplementary material for: Gene expression profile of intramuscular muscle in Nellore cattle with extreme values of fatty acid
Source: PubMed Central journal article supplement (PMC5123393; doi:10.1186/s12864-016-3232-y), 2016-11-25
Supplement: 12864_2016_3232_MOESM1_ESM.pdf [file 12864_2016_3232_MOESM1_ESM.pdf]

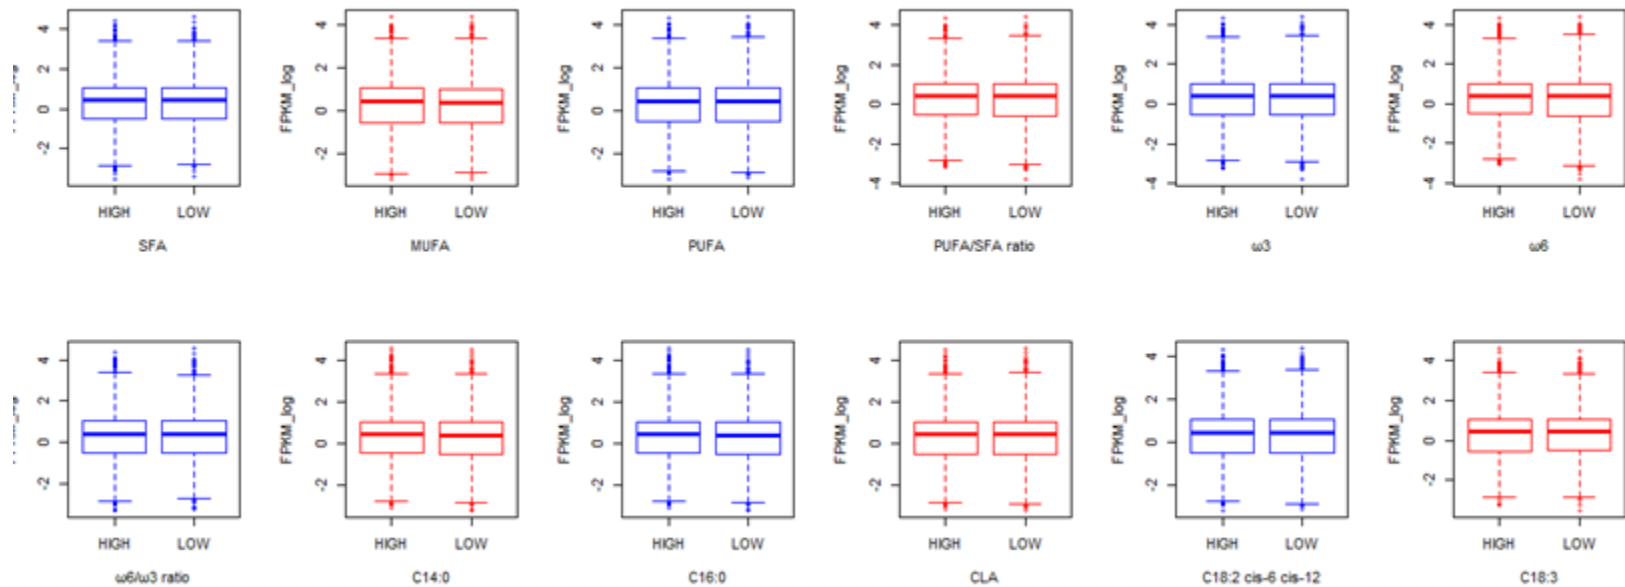

Additional File 1. Boxplot of the transcript abundance distribution for each beef fatty acid and gene expressed.
