# Supplementary material for: Gene expression profile of intramuscular muscle in Nellore cattle with extreme values of fatty acid
Source: PubMed Central journal article supplement (PMC5123393; doi:10.1186/s12864-016-3232-y), 2016-11-25
Supplement: 12864_2016_3232_MOESM2_ESM.pdf [file 12864_2016_3232_MOESM2_ESM.pdf]

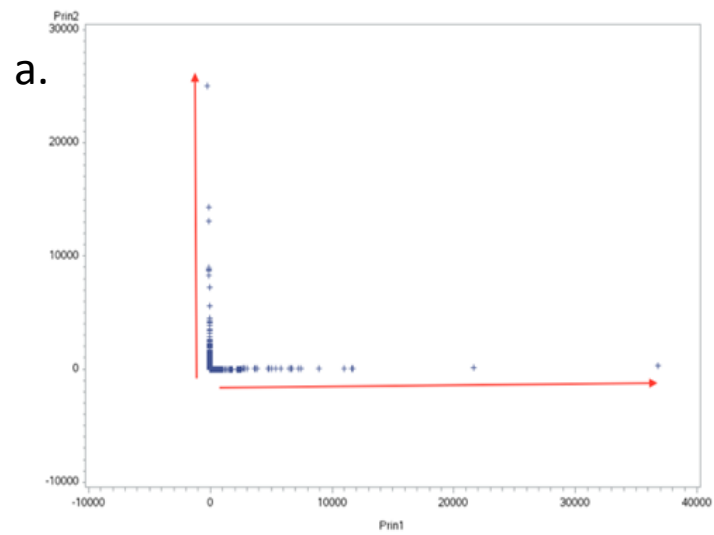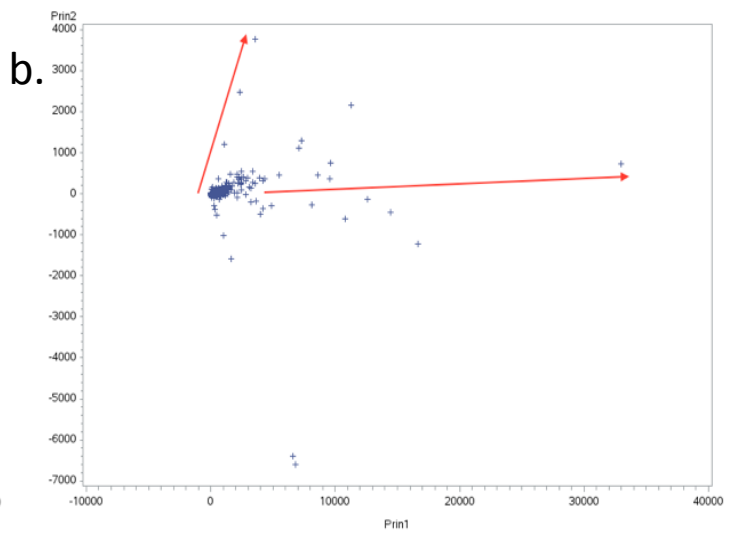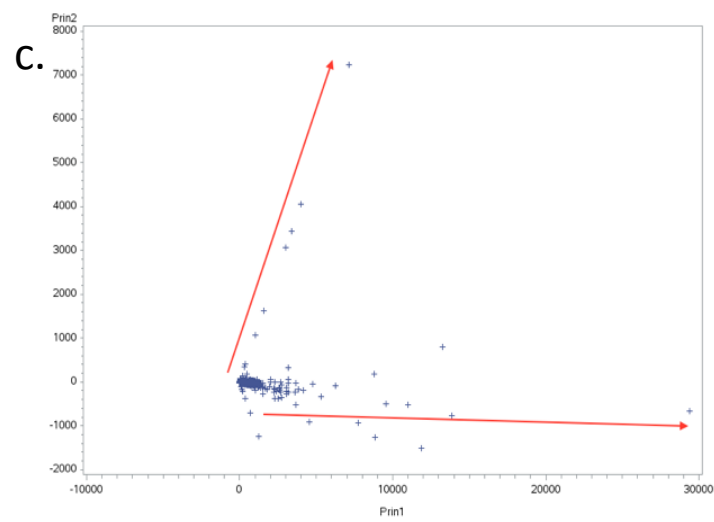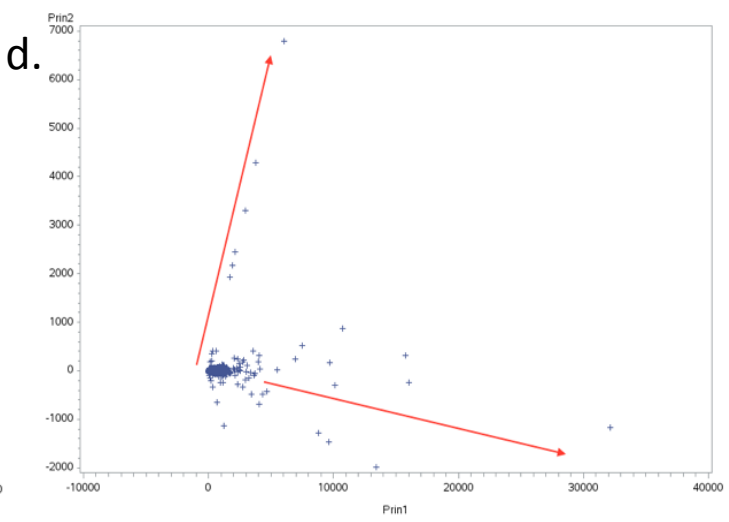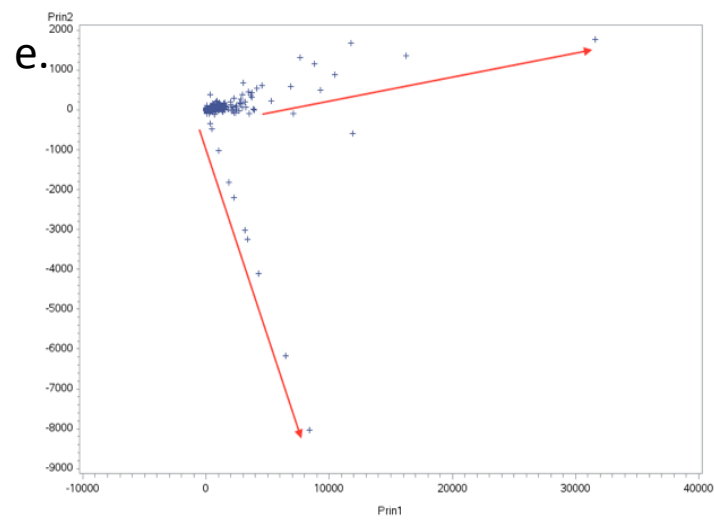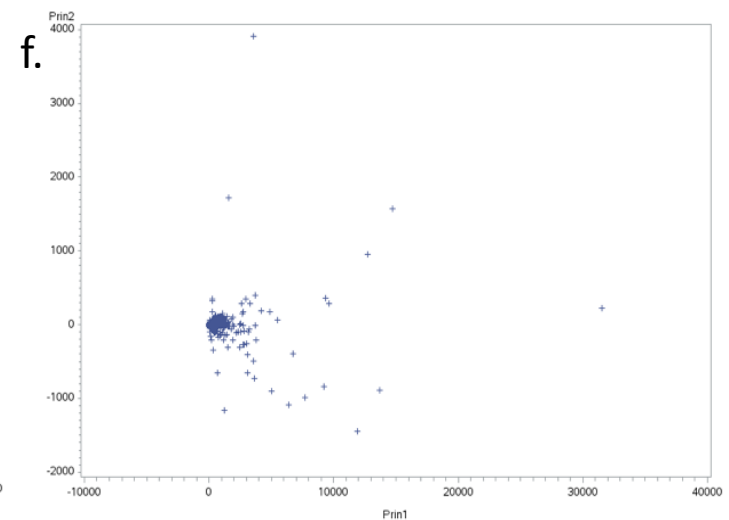

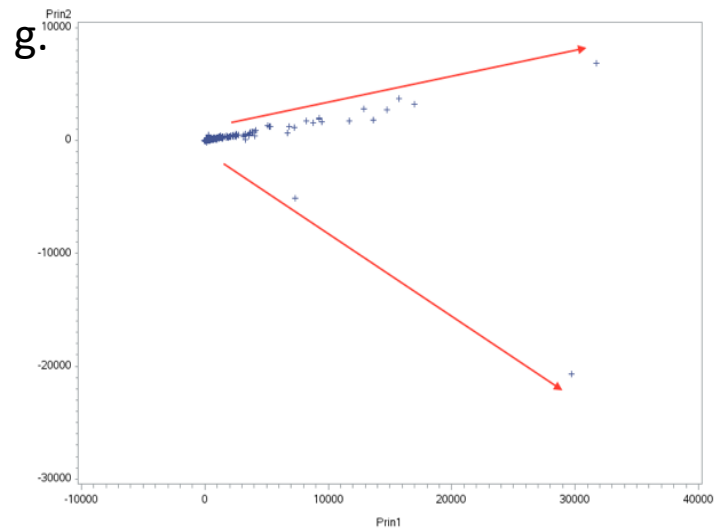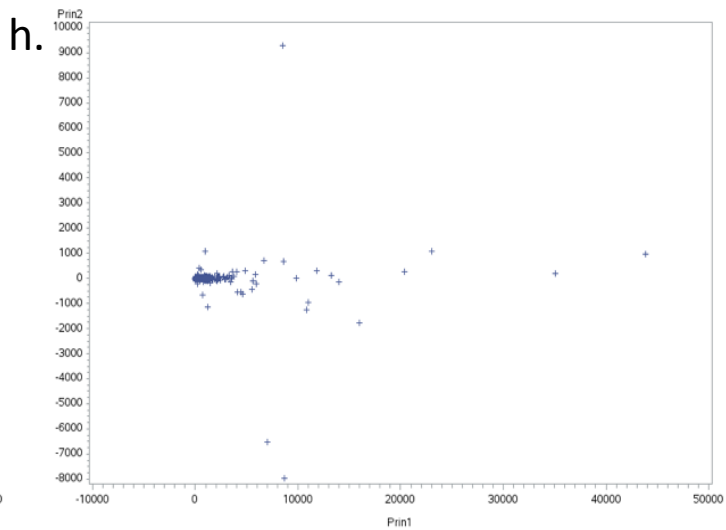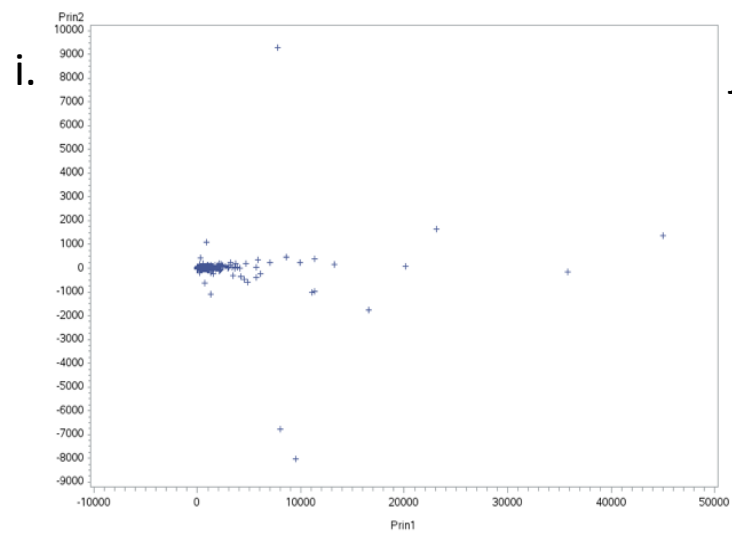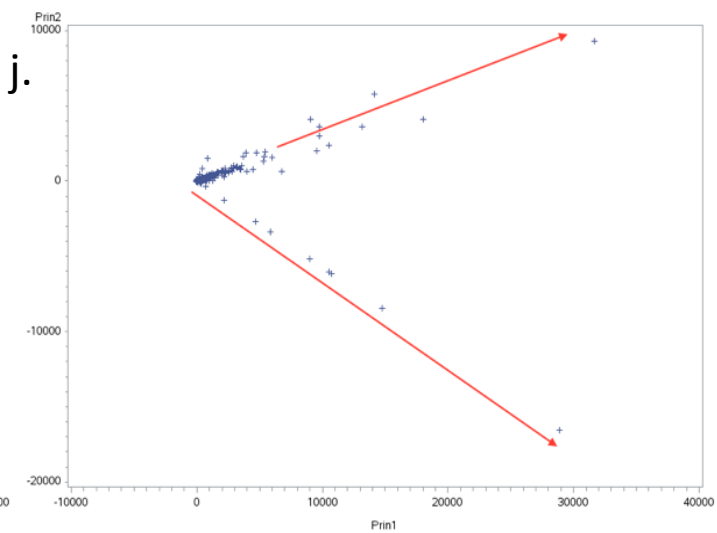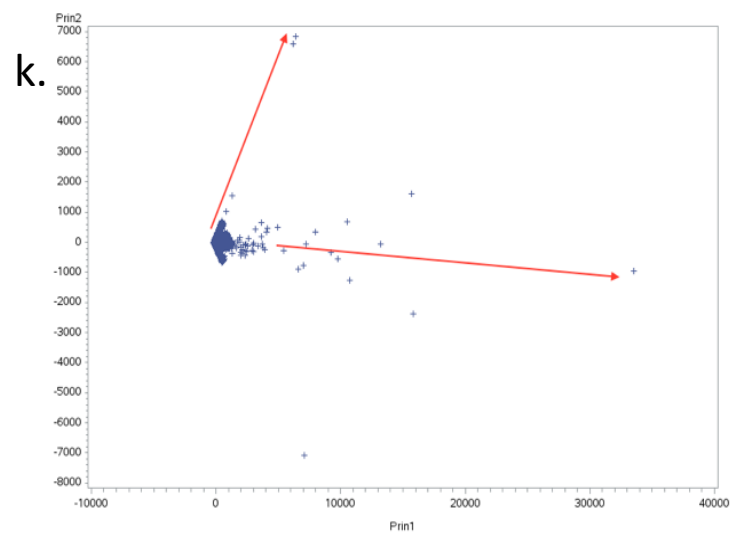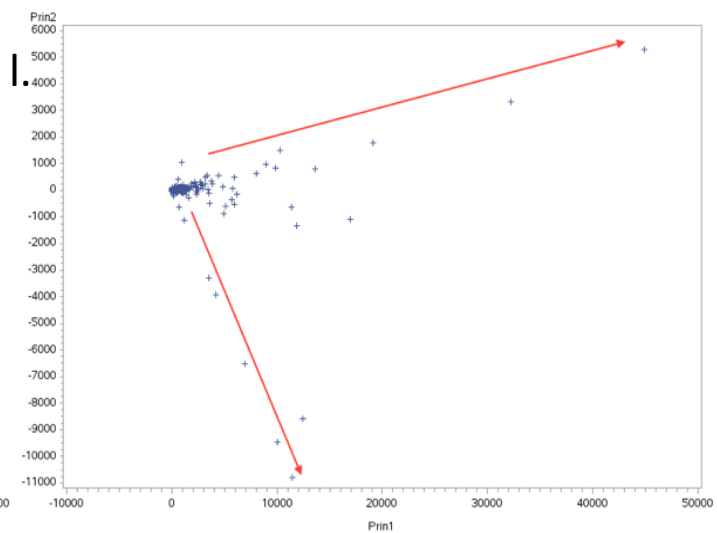

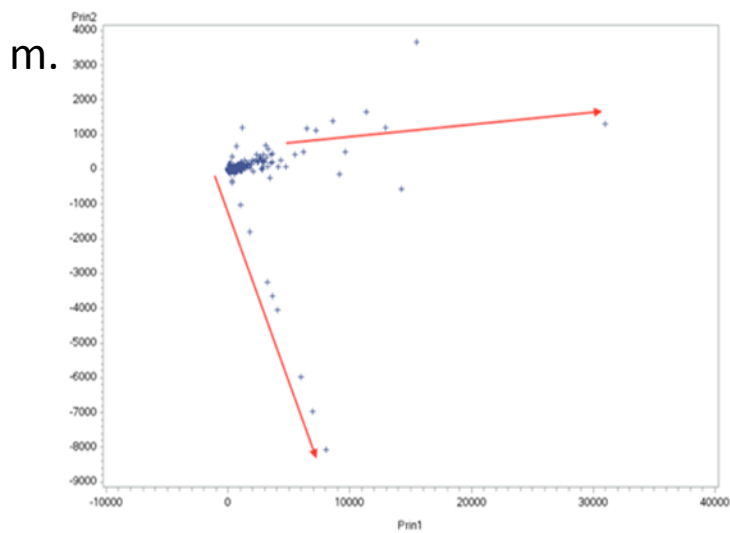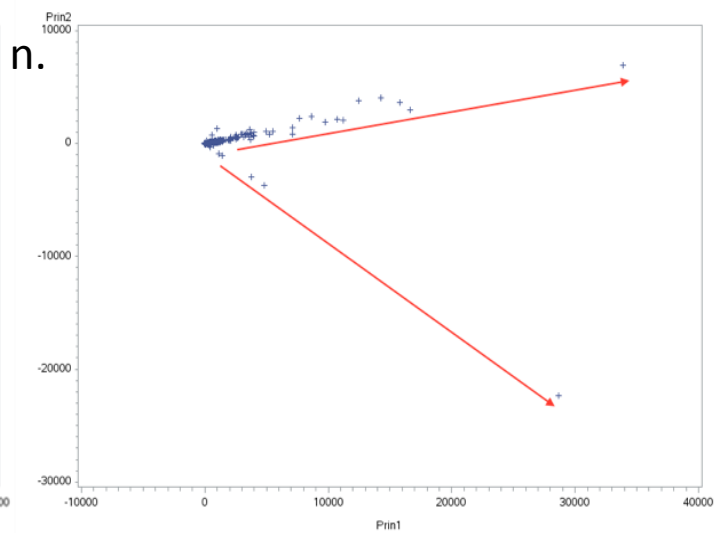

Additional File 2. Principal Component Analysis (PCA) of gene FPKM values between the high and low groups with fatty acids profile: (a) PCA for sum of SFA; (b) PCA for sum of MUFA; (c) PCA for sum of PUFA; (d) PCA for sum of PUFA/SFA ratio; (e) PCA for sum of n3; (f) PCA for sum of n6; (g) PCA for n6/n3 ratio; (h) PCA for myristic acid (C14:0); (i) PCA for palmitic acid (C16:0); (j) PCA for stearic acid (C18:0); (k) PCA for oleic acid (C18:1 cis-9); (l) PCA for conjugated linoleic acid (C18:2 cis-9 trans-11); (m) PCA for linoleic acid (C18:2 cis6 cis12 n6); (n) PCA for  $\alpha$ -linolenic (C18:3 n3).
